# Supplementary material for: 2-Hydroxyglutarate Production, but Not Dominant Negative Function, Is Conferred by Glioma-Derived NADP+-Dependent Isocitrate Dehydrogenase Mutations
Source: PubMed Central journal article supplement (PMC3033901; doi:10.1371/journal.pone.0016812), 2011-02-04
Supplement: pone.0016812.s001.pdf [file pone.0016812.s001.pdf]

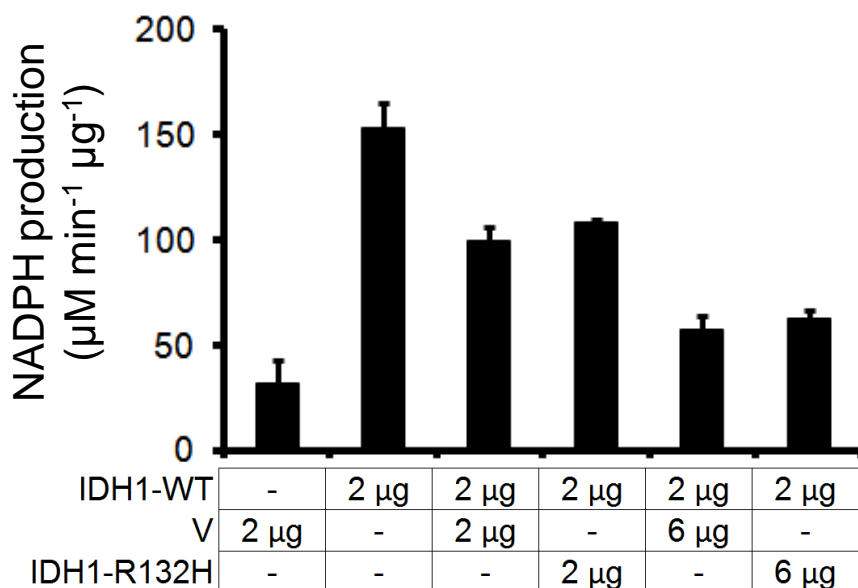

**Figure S1. Co-expression of IDH1-R132H with IDH1-WT does not lower NADP<sup>+</sup>-IDH activity more than vector alone.**

HOG cells were transfected with the indicated amounts of pCMV6 vectors to express IDH1-WT, IDH1-R132H, or vector alone (V), as indicated. 48 hours after transfection, cells were lysed and total cellular NADP<sup>+</sup>-IDH activity was determined at 1.3mM isocitrate. Results are from two independent measurements of lysates and are representative of two independent experiments.
